# Supplementary material for: Facile synthesis of polystyrene/gold composite particles as a highly active and reusable catalyst for aerobic oxidation of benzyl alcohol in water
Source: Royal Society of Chemistry journal article supplement (doi:10.1039/c4ra01522c), 2014-01-01
Supplement: c4ra01522c1.pdf [file c4ra01522c1.pdf]

## Supplementary Information

# Facile Synthesis of Polystyrene/Gold Composite Particles as Highly Active and Reusable Catalyst for Aerobic Oxidation of Benzyl Alcohol in Water

Yunxing Li\*, Yan Gao, Cheng Yang, Shengsheng Sha, Jiefu Hao, Yan Wu

*The Key Laboratory of Food Colloids and Biotechnology, Ministry of Education, School of*

*Chemical and Material Engineering, Jiangnan University, Wuxi 214122, China. Fax: (86-510)*

*8591-7763; Tel: (86-510) 8591-7763; Email: yunxingli@jiangnan.edu.cn*

### **Experimental section**

#### **Materials**

Styrene (Shanghai Chemical Reagent Co.) was purified by distillation under reduced pressure. Azobisisobutyronitrile (Shanghai Chemical Reagent Co.) was purified by recrystallization in absolute ethanol. Benzyl alcohol was purchased from Sigma-Aldrich. Polyvinylpyrrolidone (PVP, K-30), absolute ethanol, 2-propanol, potassium carbonate, potassium hydroxide, sodium borohydride, trisodium citrate, hydrochloric acid, ethyl acetate, and H<sub>2</sub>AuCl<sub>4</sub> were obtained from the Shanghai Chemical Reagent Co. and used as received. Ultrapure water (18.2 MΩ·cm) was used throughout the experiments.

#### **Synthesis of Polystyrene microspheres**

PS microspheres with an average diameter of about 2.2 μm were synthesized by dispersion polymerization. The PVP (2.8 g) was dissolved in 2-propanol (160 mL) and then the obtained solution was heated up to 70 °C in a round-bottom flask. Synchronously, the solution was purged with nitrogen to eliminate the inhibiting effect of oxygen. Subsequently, styrene (20 g) and azobisisobutyronitrile (0.2 g) were added to the above-mentioned solution under vigorous mechanical stirring. The polymerization was allowed to proceed for 24 h before cooling to ambient temperature. Finally, the PS microspheres were collected and dispersed in water by centrifugation.

#### **Synthesis of Gold Nanoparticles**

Trisodium citrate ( $8.2 \times 10^{-2}$  mmol) and H<sub>2</sub>AuCl<sub>4</sub> ( $6.5 \times 10^{-2}$  mmol) were dissolved in water (126 mL) under stirring at room temperature. After 5 min, freshly prepared NaBH<sub>4</sub> (0.2 mmol) aqueous solution was injected into the above-mentioned solution. The reaction was allowed to proceed for 30 min. As the concentration of H<sub>2</sub>AuCl<sub>4</sub> remains constant, gold nanoparticles with different size

were obtained by varying the concentration of NaBH<sub>4</sub> (e.g., 0.02 and 0.1 mmol).

### ***Synthesis of PS/Au Composite Particles***

The appropriate amount of aqueous dispersion of PS microspheres (1 g, 10 wt%) was injected into a certain volume of aqueous dispersion of gold nanoparticles. The mixture was allowed to stir at 300 rpm using a magnetic stirrer for 12 h at room temperature. Herein the weight ratio of gold nanoparticle to PS microsphere ( $W_{Au}/W_{PS}$ ) was determined by the following equation:

$$W_{Au}/W_{PS} = 4(R+r)^2r\rho_{Au}/(R^3\rho_{PS})$$

where  $R$ ,  $r$ ,  $\rho_{PS}$ , and  $\rho_{Au}$  are the radius and density of individual PS microsphere (subscript PS) and gold nanoparticle (subscript Au), respectively.

### ***Oxidation of Benzyl Alcohol Using PS/Au Composite Particles***

Benzyl alcohol (0.1 mmol), K<sub>2</sub>CO<sub>3</sub> (0.3 mmol), PS/Au composite particles (Au, 0.003 mmol), and water (10 mL) were added to a test tube in turn. The obtained mixture was bubbled with air or oxygen for 30 min. Then, the test tube was encapsulated and shaken vigorously at a given condition. After the reaction was completed, the catalyst particles were recovered by centrifugation and reused when a new substrate, base, and water were added. The aqueous phase was treated with hydrochloric acid (0.1 M) and then extracted with ethyl acetate (5 mL × 3). The extracted layer was dried over anhydrous Na<sub>2</sub>SO<sub>4</sub>, concentrated, and finally analyzed using gas chromatography.

### ***Characterization***

High-resolution transmission electron microscopy and energy-dispersive X-ray spectroscopy were performed by a JEM-2100 microscope (JEOL Co., Japan). X-ray diffraction pattern of PS/Au composite particles was recorded on a German Bruker-AXS D8 Advance. The gold content on the PS microsphere was quantified by inductively coupled plasma-optical emission spectrometer (ICP-OES, Agilent, 700 Series). Gas chromatography analyses were performed on Agilent 7890A apparatus (USA).
